# Supplementary material for: X-ray Crystallographic Structure of α-Helical Peptide Stabilized by Hydrocarbon Stapling at i,i + 1 Positions
Source: MDPI journal article supplement (doi:10.3390/ijms22105364), 2021-05-19

## Supplementary Materials

### X-ray Crystallographic Structure of $\alpha$ -Helical Peptide Stabilized by Hydrocarbon Stapling at *i,i*+1 Positions

Yui Makura <sup>1</sup>, Atsushi Ueda <sup>1,\*</sup>, Takuma Kato <sup>2</sup>, Akihiro Iyoshi <sup>1</sup>, Mei Higuchi <sup>1</sup>,  
Mitsunobu Doi <sup>2</sup> and Masakazu Tanaka <sup>1,\*</sup>

<sup>1</sup> Graduate School of Biomedical Sciences, Nagasaki University, 1-14 Bunkyo-machi,  
Nagasaki 852-8521, Japan

<sup>2</sup> Faculty of Pharmacy, Osaka Medical and Pharmaceutical University, Osaka 569-1094,  
Japan

E-mail for A.U.: [aueda@nagasaki-u.ac.jp](mailto:aueda@nagasaki-u.ac.jp)

E-mail for M.T.: [matanaka@nagasaki-u.ac.jp](mailto:matanaka@nagasaki-u.ac.jp)

#### Table of Contents

|                                                                   |    |
|-------------------------------------------------------------------|----|
| 1. X-Ray crystallographic data of stapled peptide <b>10</b> ..... | S2 |
| 2. Copies of <sup>1</sup> H and <sup>13</sup> C NMR spectra ..... | S5 |

## 1. X-ray crystallographic data of stapled peptide 10

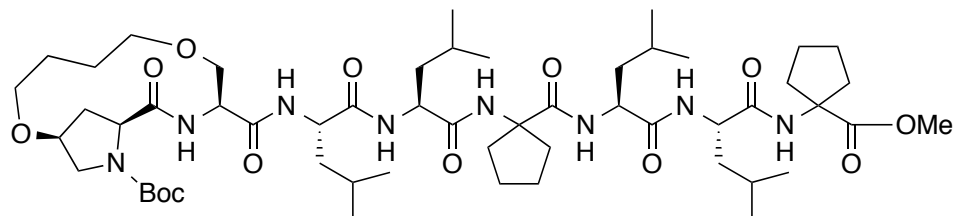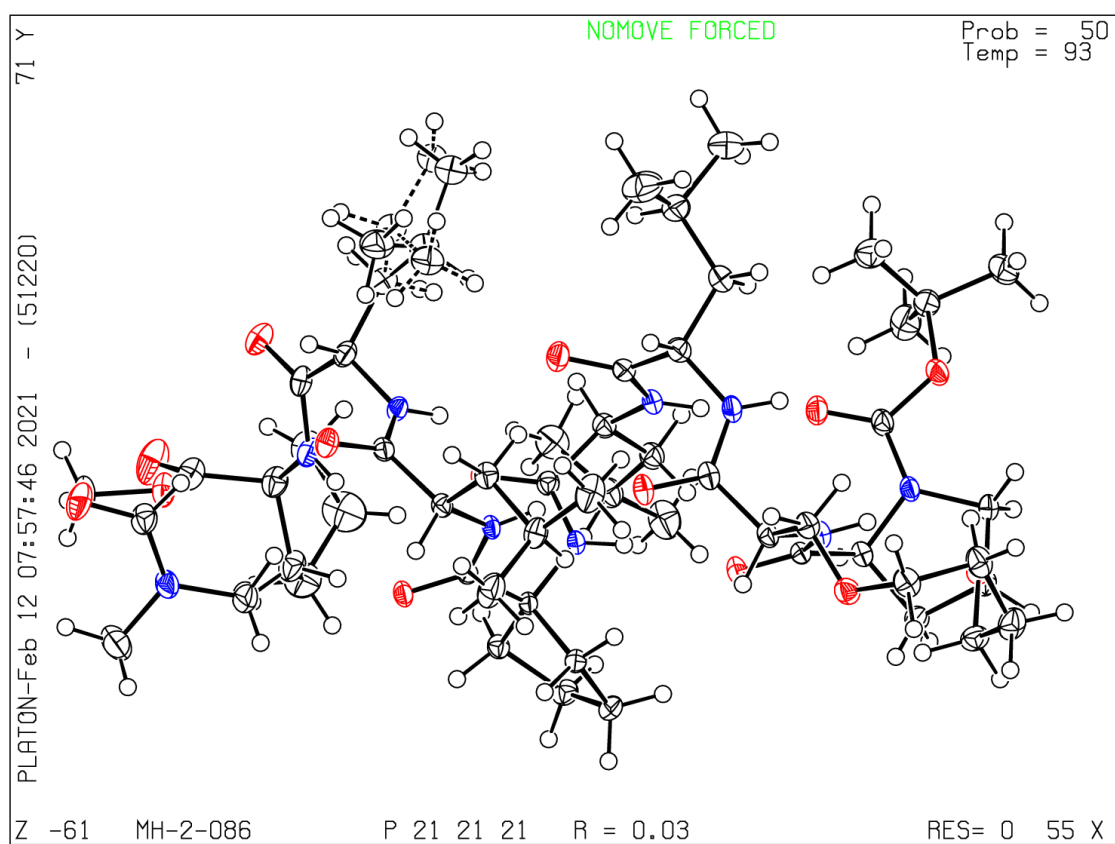

**Figure S1.** ORTEP drawing of stapled peptide **10** (ellipsoids at 50% probability).

**Table S1.** Selected torsion angles  $\omega$ ,  $\phi$ ,  $\psi$ , and  $\chi$  [ $^\circ$ ] for stapled peptide **10**, as determined by an X-ray crystallographic analysis.

|            |        |
|------------|--------|
| $\omega_0$ | −170.4 |
| $\phi_1$   | −67.9  |
| $\psi_1$   | −45.6  |
| $\omega_1$ | −177.3 |
| $\phi_2$   | −66.4  |
| $\psi_2$   | −44.4  |
| $\omega_2$ | 179.8  |
| $\phi_3$   | −61.2  |
| $\psi_3$   | −43.0  |
| $\omega_3$ | 177.3  |
| $\phi_4$   | −59.5  |
| $\psi_4$   | −53.3  |
| $\omega_4$ | −176.1 |
| $\phi_5$   | −57.1  |
| $\psi_5$   | −46.2  |
| $\omega_5$ | −169.4 |
| $\phi_6$   | −75.3  |
| $\psi_6$   | −21.7  |
| $\omega_6$ | −179.5 |
| $\phi_7$   | −102.3 |
| $\psi_7$   | 7.9    |
| $\omega_7$ | −174.4 |
| $\phi_8$   | −60.6  |
| $\psi_8$   | −41.6  |
| $\omega_8$ | −170.4 |
| $\chi_1$   | 19.1   |
| $\chi_2$   | −70.4  |
| $\chi_3$   | −172.8 |
| $\chi_4$   | 172.3  |
| $\chi_5$   | −81.9  |
| $\chi_5'$  | 75.0   |
| $\chi_6$   | −65.9  |
| $\chi_7$   | −58.2  |
| $\chi_8$   | −143.3 |
| $\chi_8'$  | 115.6  |

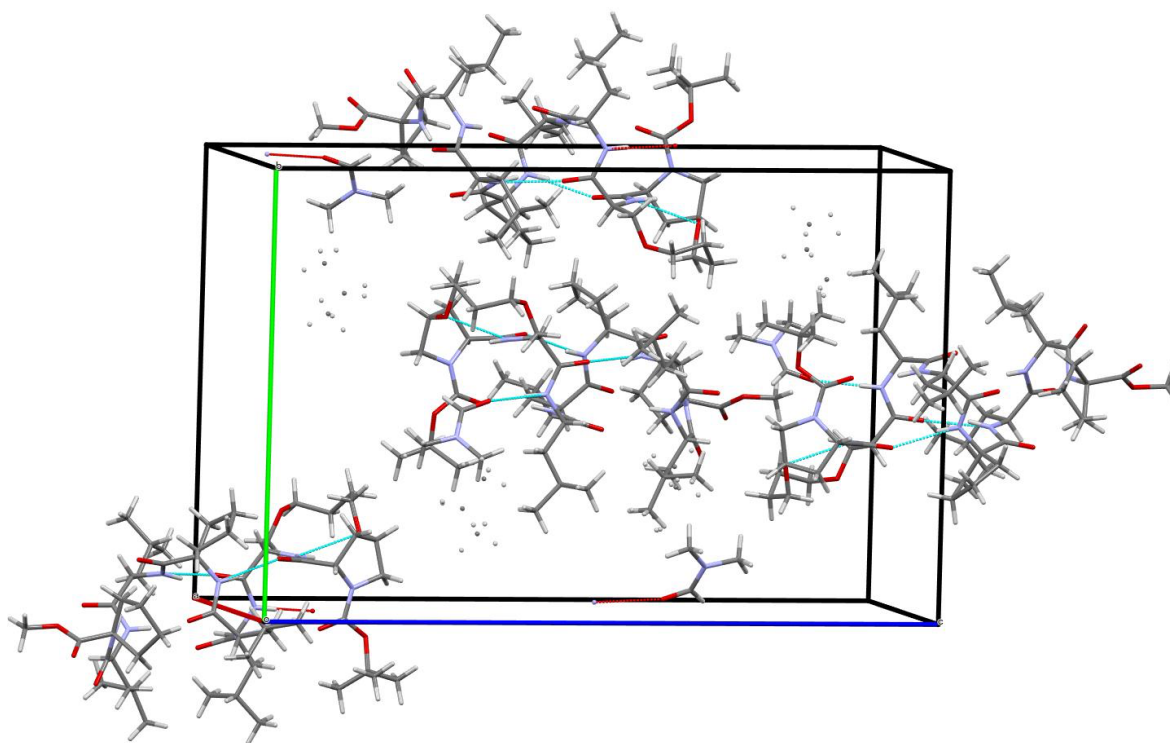

**Figure S2.** Packing structure of stapled peptide **10** in the crystal state.

# 1. NMR spectra.

$^1\text{H}$  NMR of **2** (500 MHz,  $\text{CDCl}_3$ )

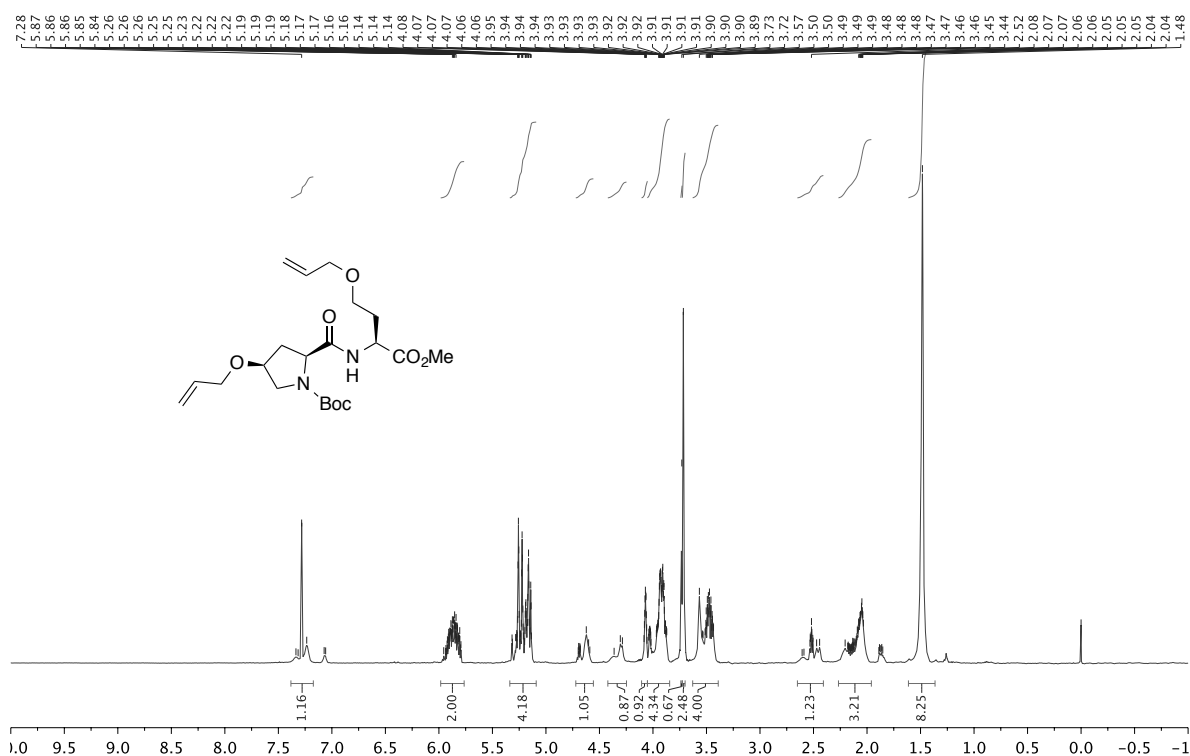

$^1\text{H}$  NMR of **3** (500 MHz,  $\text{CDCl}_3$ )

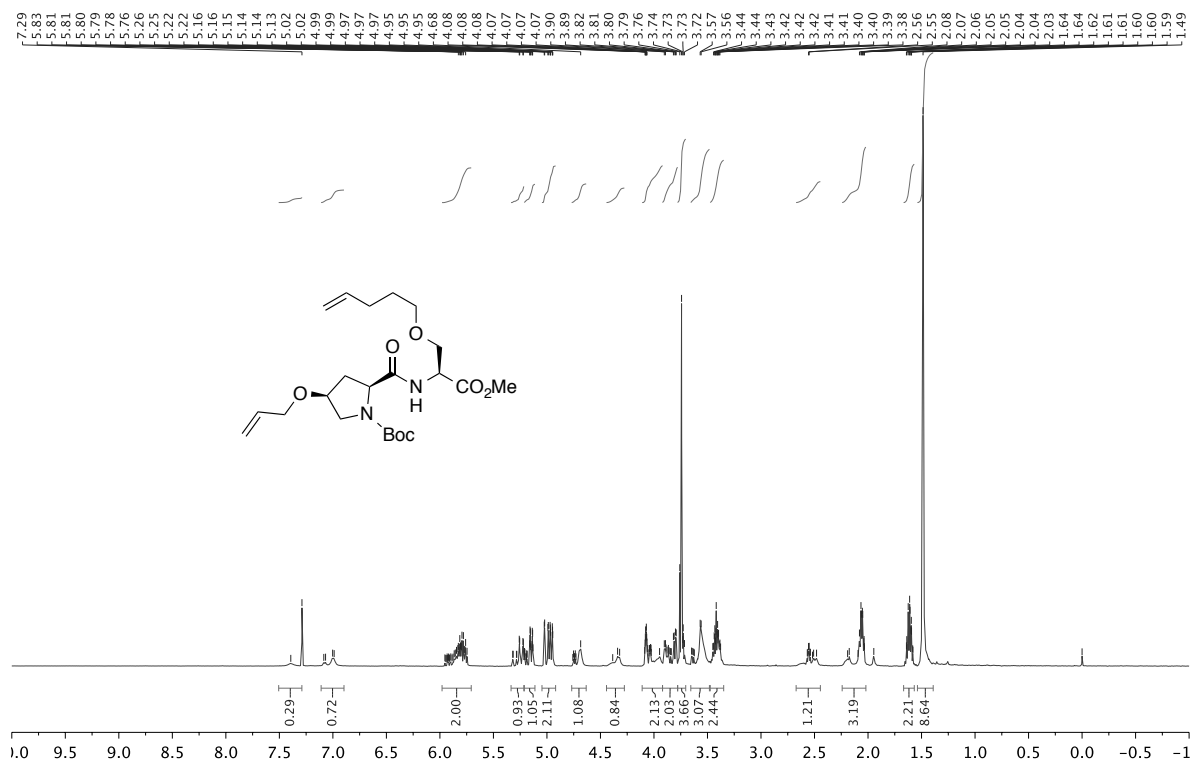

$^{13}\text{C}$  NMR of **3** (125 MHz,  $\text{CDCl}_3$ )

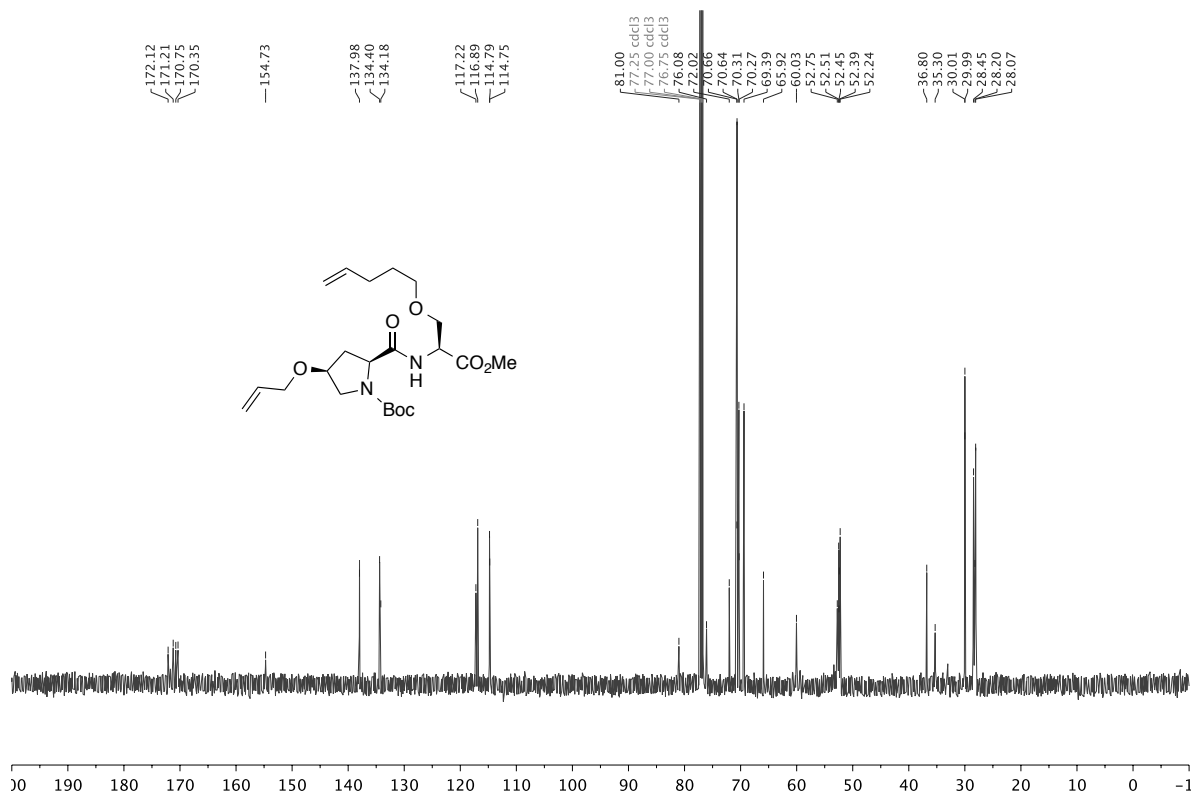

<sup>1</sup>H NMR of **4** (500 MHz, CDCl<sub>3</sub>)

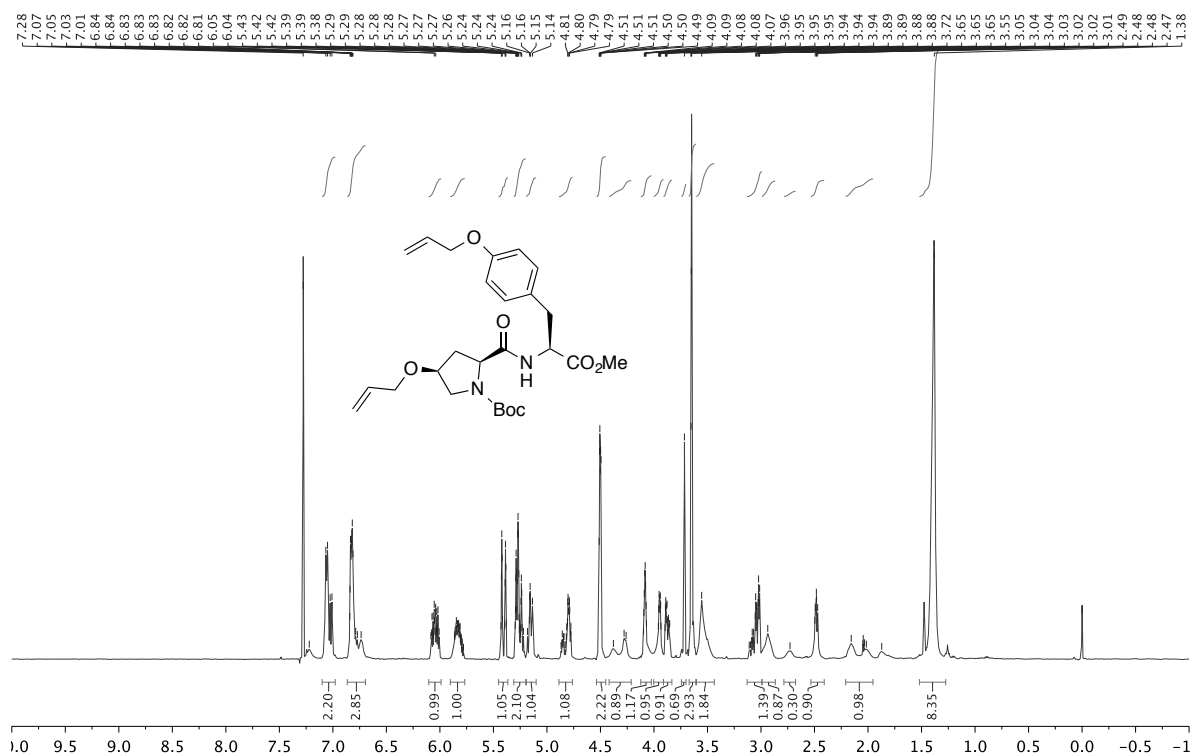

<sup>13</sup>C NMR of **4** (125 MHz, CDCl<sub>3</sub>)

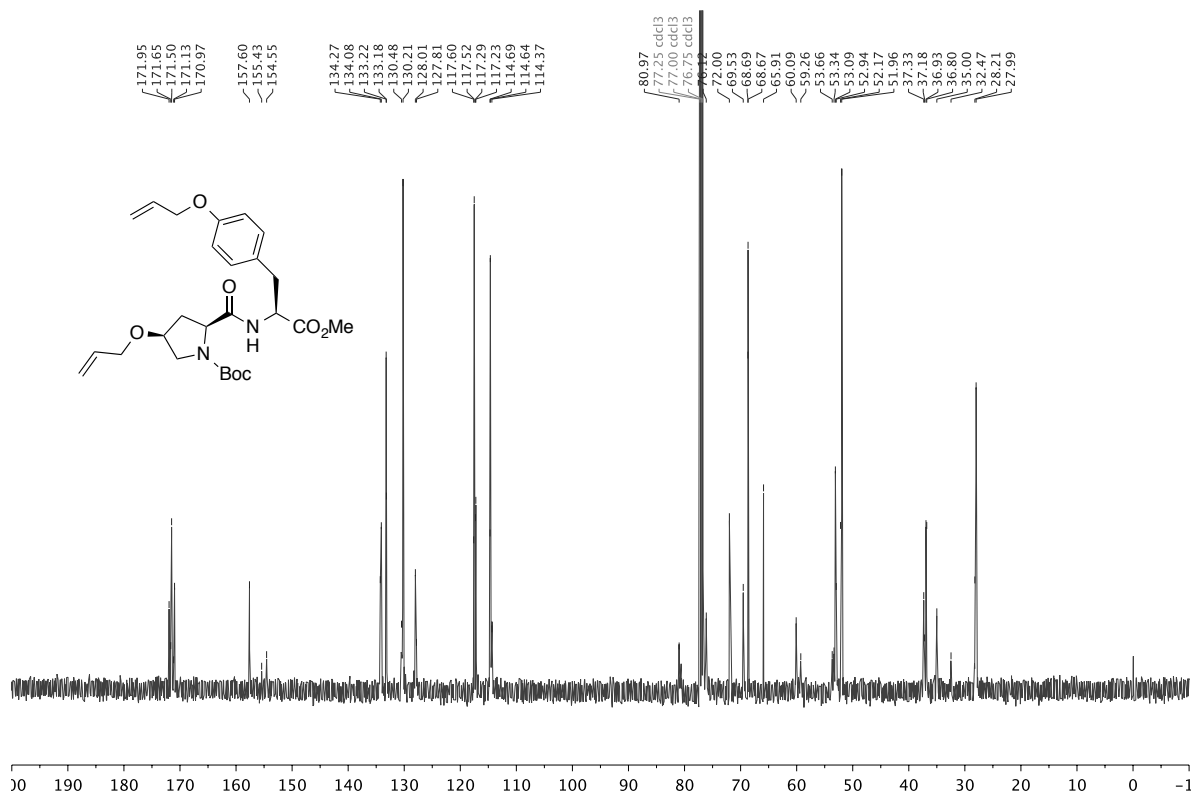

Chemical structure of compound 10 is shown above the spectrum. The structure is a 4-membered ring with an oxygen atom, a nitrogen atom, and a carbonyl group. The nitrogen is substituted with a Boc group and a vinyl group. The carbonyl is substituted with a methyl ester group. The spectrum shows peaks for the vinyl protons (6.0-6.8 ppm), the Boc group (1.4-1.6 ppm), the methyl ester (3.6-3.8 ppm), and the ring protons (3.9-4.1 ppm). Integration values are provided below the peaks.

Chemical structure of compound 10 is shown above the spectrum. The structure is a 4-membered ring with a nitrogen atom, a carbonyl group, and a Boc-protected amine. The Boc group is a tert-butyl ester. The amine is a 2-allyl-2-methoxyethylamine derivative.

<sup>13</sup>C NMR spectrum (CDCl<sub>3</sub>) of compound 10. The spectrum shows peaks at the following chemical shifts (ppm): 172.57, 170.30, 134.36, 133.56, 133.91, 117.40, 117.24, 116.86, 80.66, 77.25, 77.00, 76.75, 75.76, 72.14, 72.12, 72.03, 69.61, 69.37, 69.00, 68.00, 59.71, 53.24, 52.64, 52.52, 52.46, 52.30, 36.78, 35.20, 33.45, and 28.20.



<sup>1</sup>H NMR of **6** (400 MHz, CDCl<sub>3</sub>)

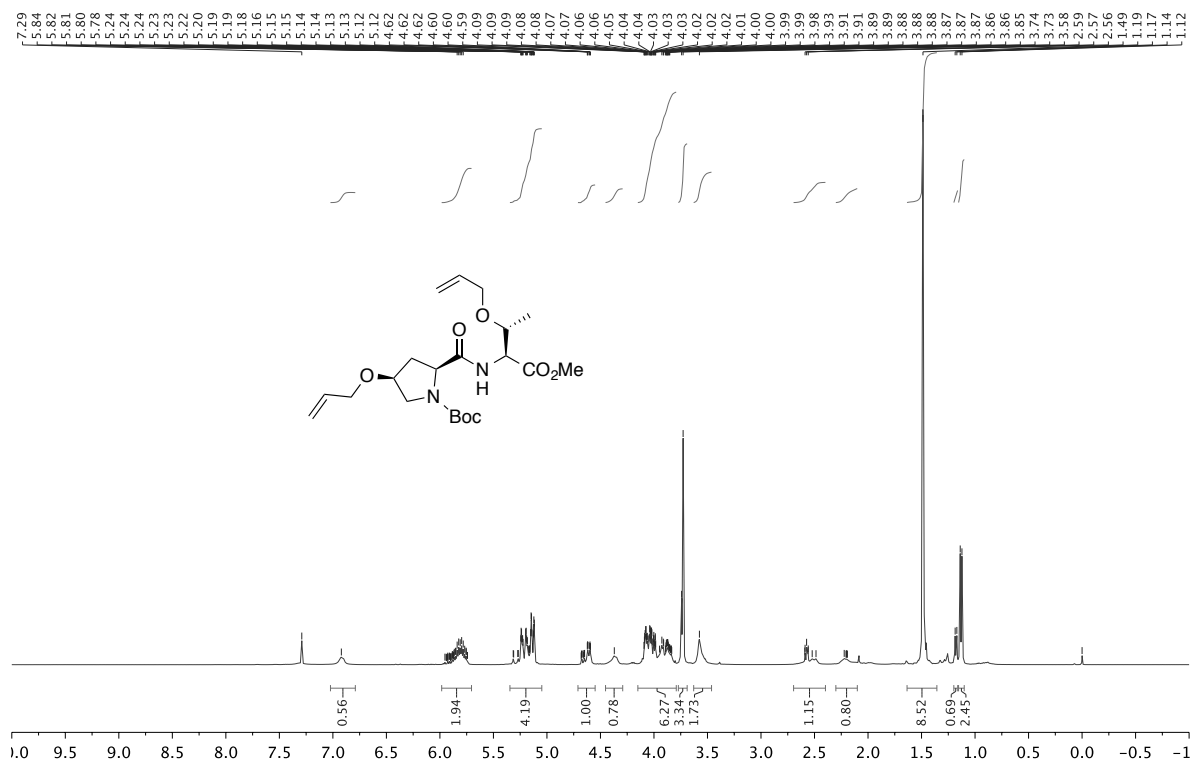

<sup>13</sup>C NMR of **6** (100 MHz, CDCl<sub>3</sub>)

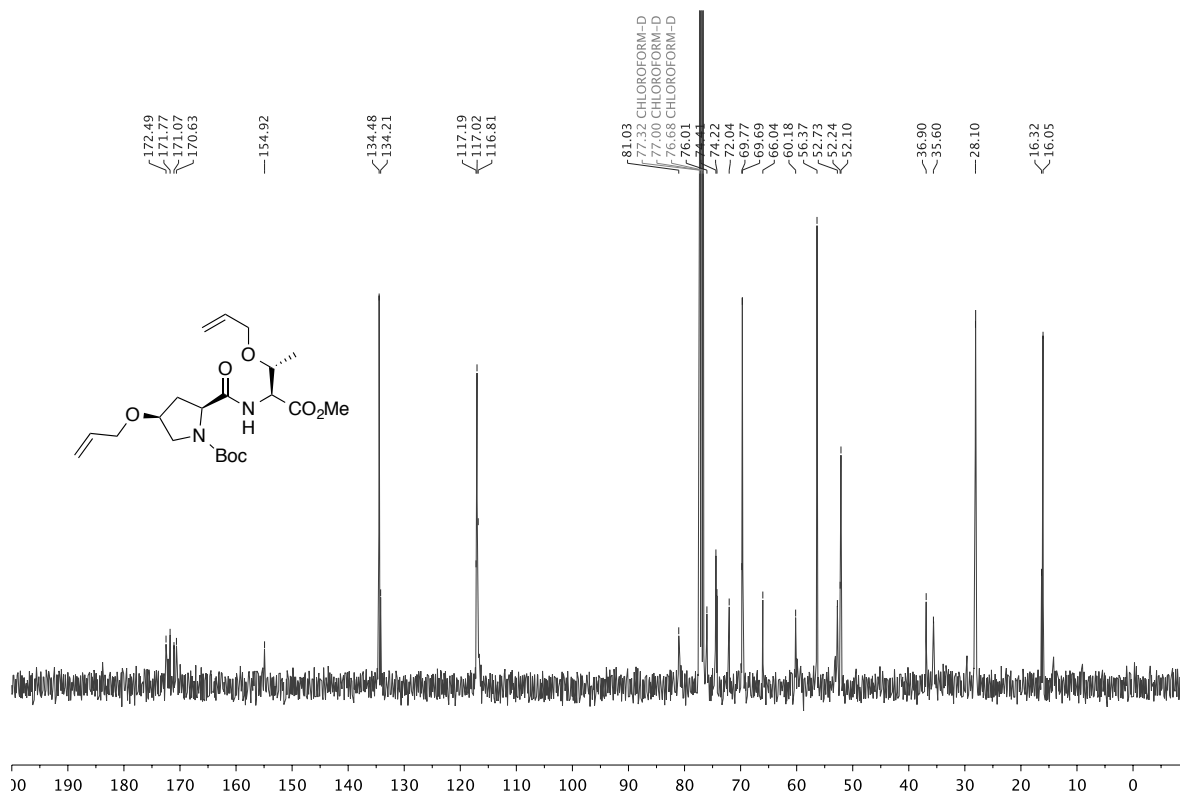

<sup>1</sup>H NMR of 7 (500 MHz, CDCl<sub>3</sub>)

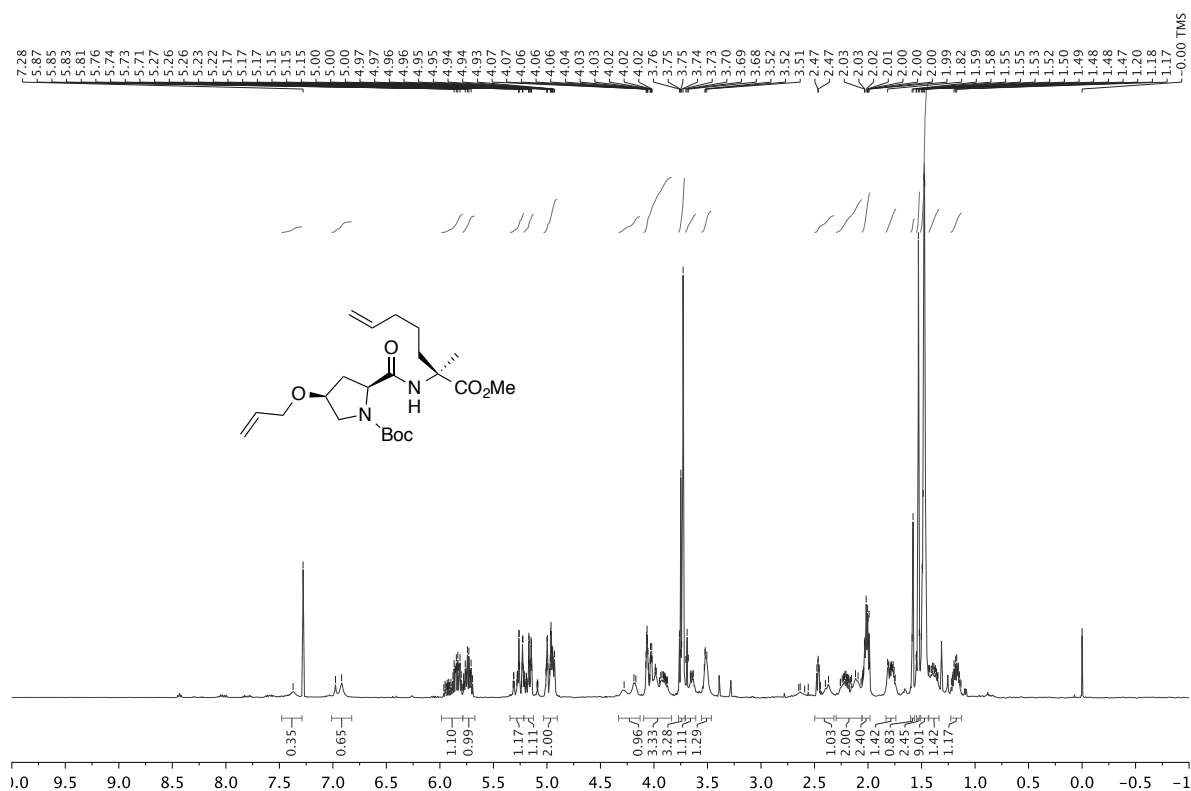

<sup>13</sup>C NMR of 7 (125 MHz, CDCl<sub>3</sub>)

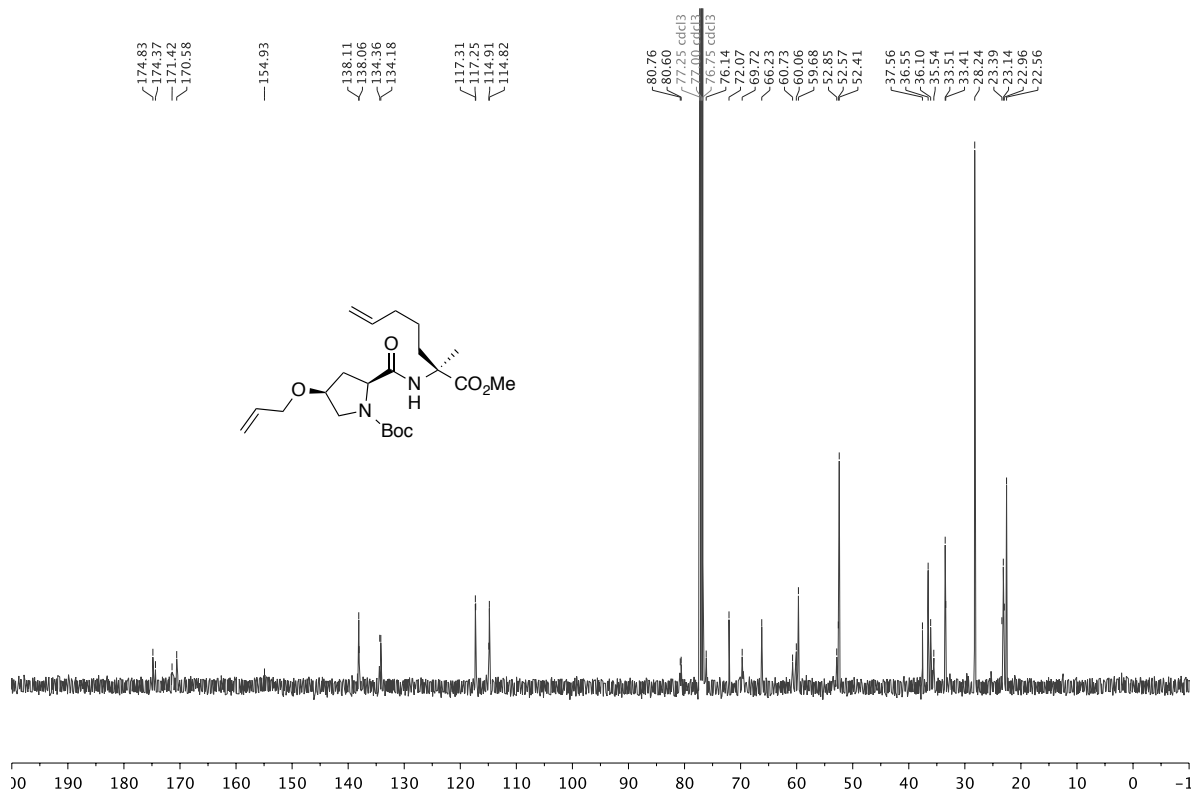

$^1\text{H}$  NMR of **1'** (500 MHz,  $\text{CDCl}_3$ )

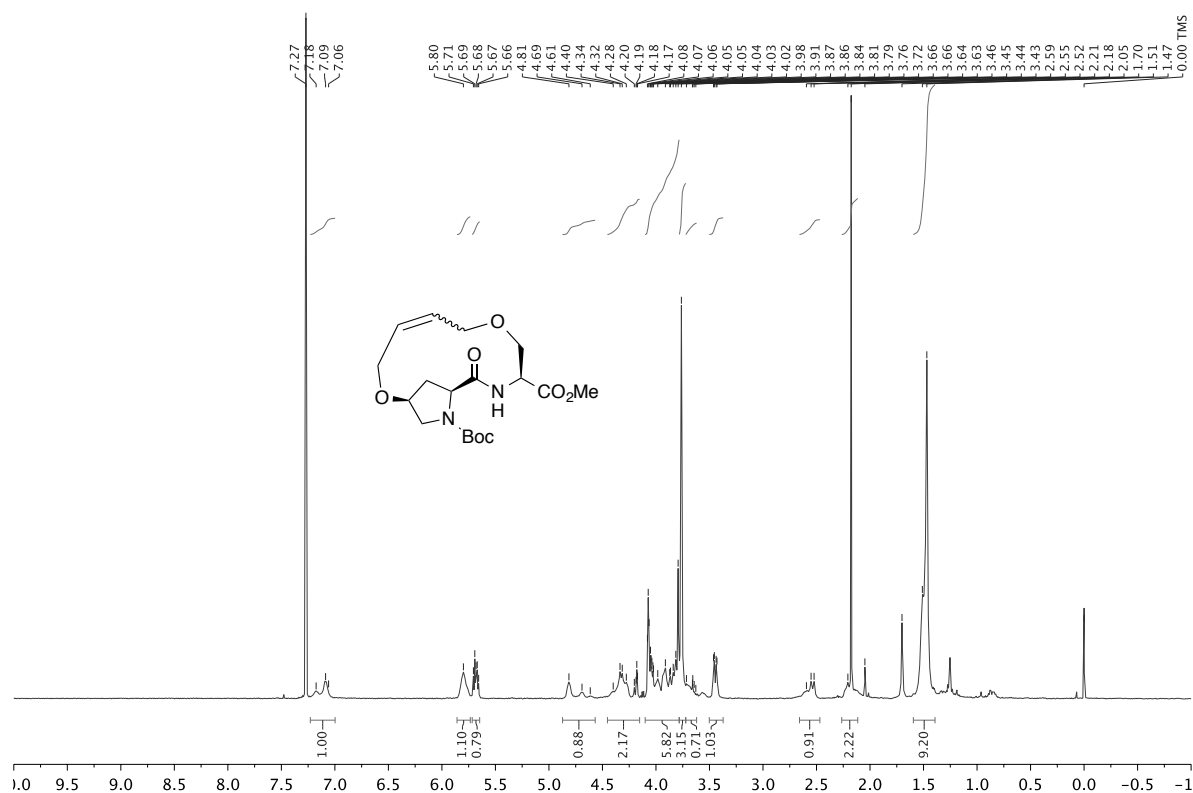

$^{13}\text{C}$  NMR of **1'** (125 MHz,  $\text{CDCl}_3$ )

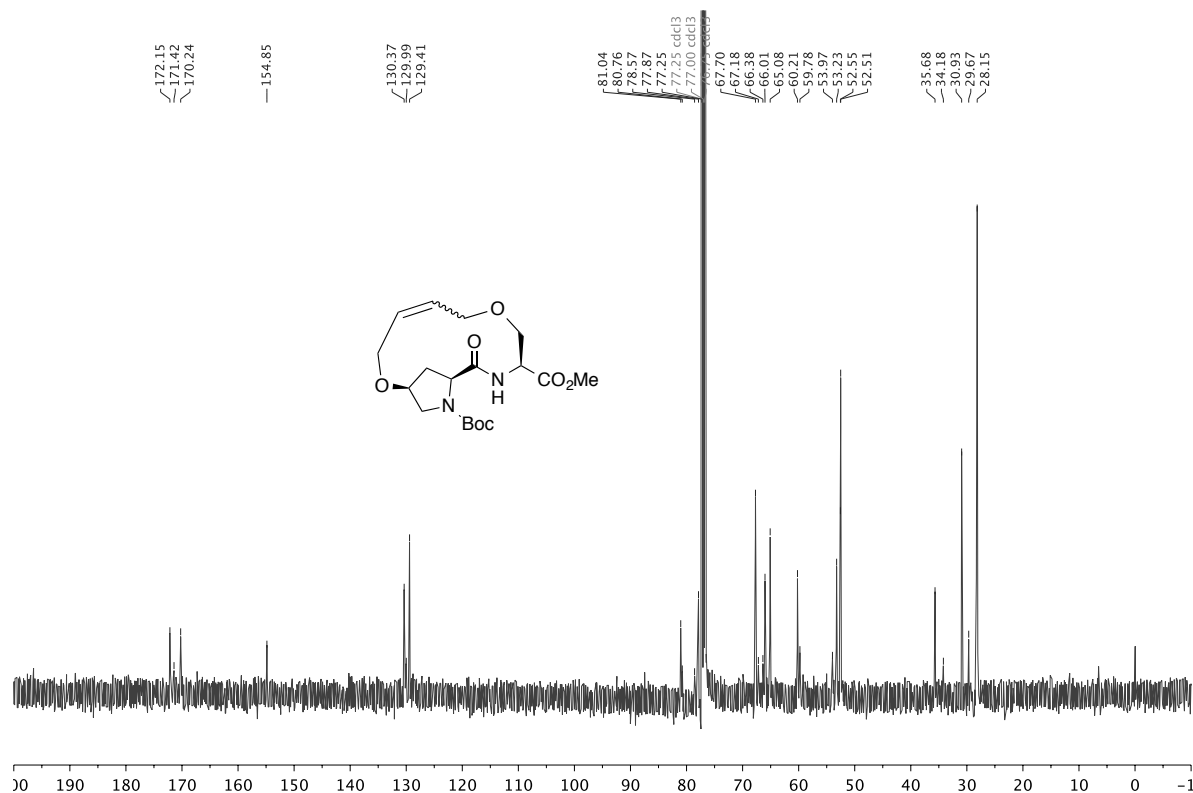

$^1\text{H}$  NMR of **2'** (500 MHz,  $\text{CDCl}_3$ )

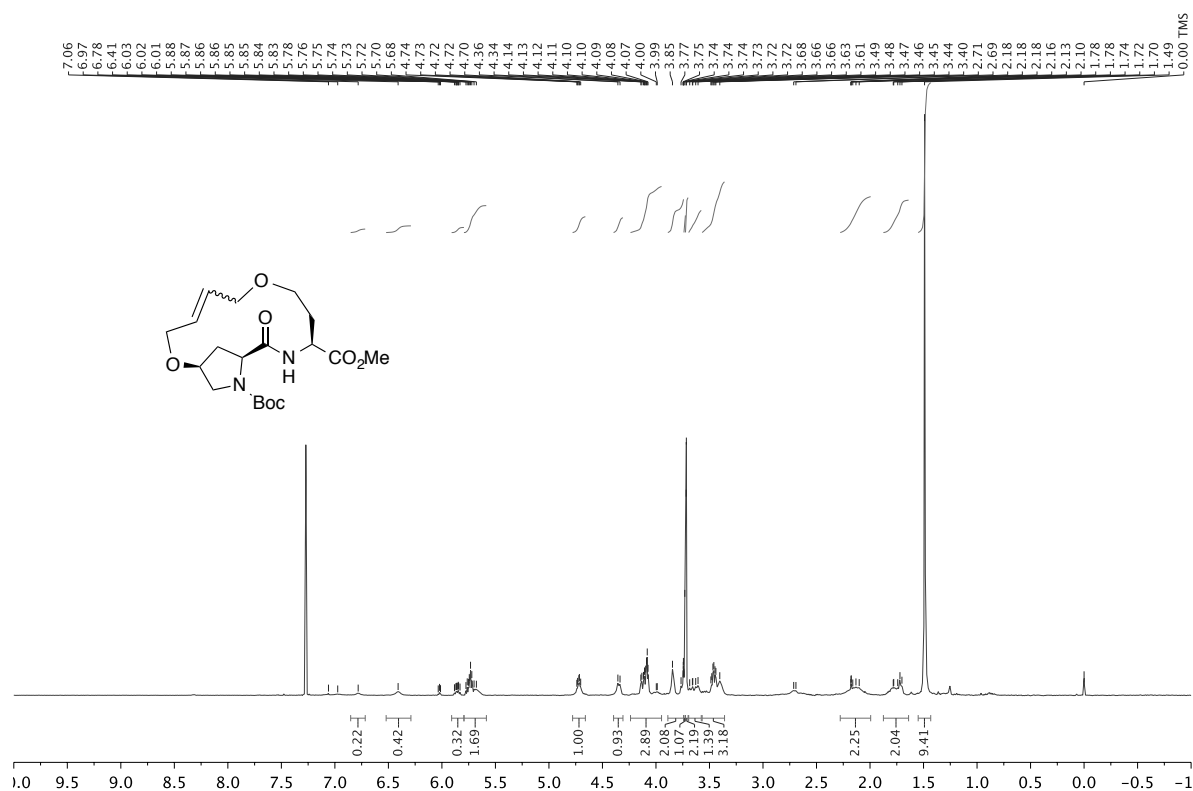

$^{13}\text{C}$  NMR of **2'** (125 MHz,  $\text{CDCl}_3$ )

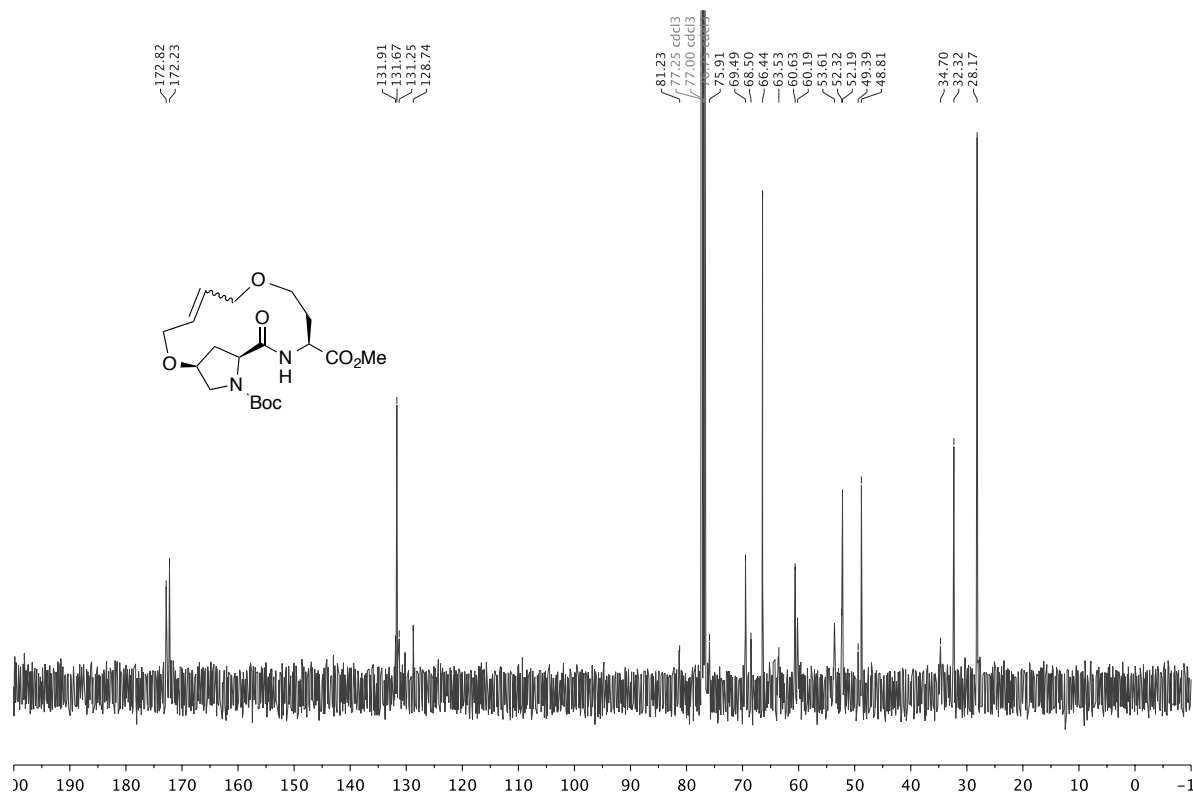

Chemical structure of compound 10 is shown above the spectrum. The structure is a complex molecule with a Boc-protected amine, a methyl ester, and a cyclohexene ring.

<sup>1</sup>H NMR spectrum (CDCl<sub>3</sub>) of compound 10. The x-axis represents chemical shift in ppm, ranging from 0.00 to 7.27. The spectrum shows several peaks, with integration values provided for some regions:

- Integration values: 0.09, 0.85, 0.80, 0.12, 0.18, 0.74, 0.14, 1.00, 0.89, 0.72, 0.76, 0.60, 0.55, 0.10, 0.23, 0.91, 4.40, 2.46, 3.84.

Chemical structure of compound 10b is shown above the spectrum. The structure is a bicyclic compound with a Boc-protected amine, a methyl ester, and a side chain containing an alkene and an acetal.

<sup>13</sup>C NMR spectrum (CDCl<sub>3</sub>) of compound 10b. The spectrum shows peaks at the following chemical shifts (ppm): 172.66, 172.11, 170.81, 170.12, 155.24, 136.42, 135.78, 135.67, 131.90, 125.52, 124.31, 124.06, 80.90, 77.25, 77.05, 77.00, 76.75, 72.72, 72.61, 70.66, 70.38, 70.34, 68.56, 68.11, 65.73, 60.52, 58.55, 52.66, 52.57, 52.40, 52.29, 36.44, 35.85, 32.28, 31.71, 28.60, 28.32, 28.10, 28.03, 27.88, 22.65.

$^1\text{H}$  NMR of **4'** (500 MHz,  $\text{CDCl}_3$ )

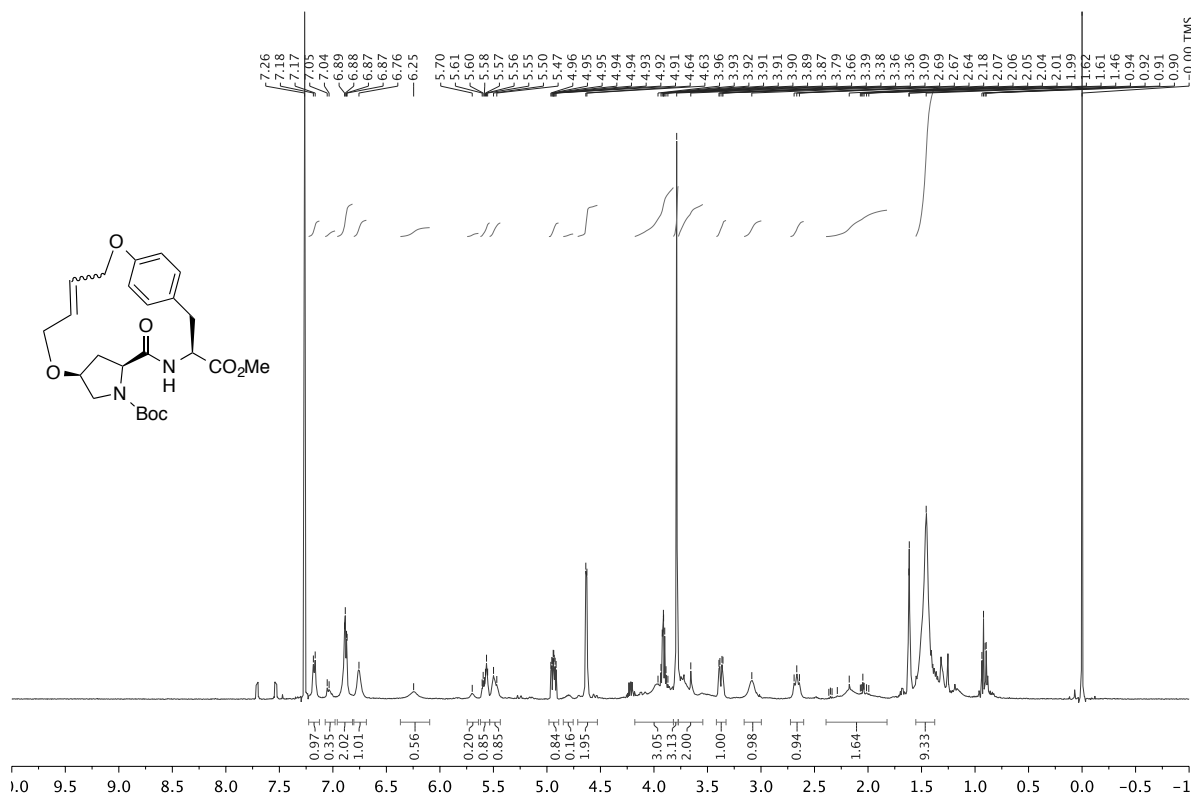

$^1\text{H}$  NMR of **5'** (500 MHz,  $\text{CDCl}_3$ )

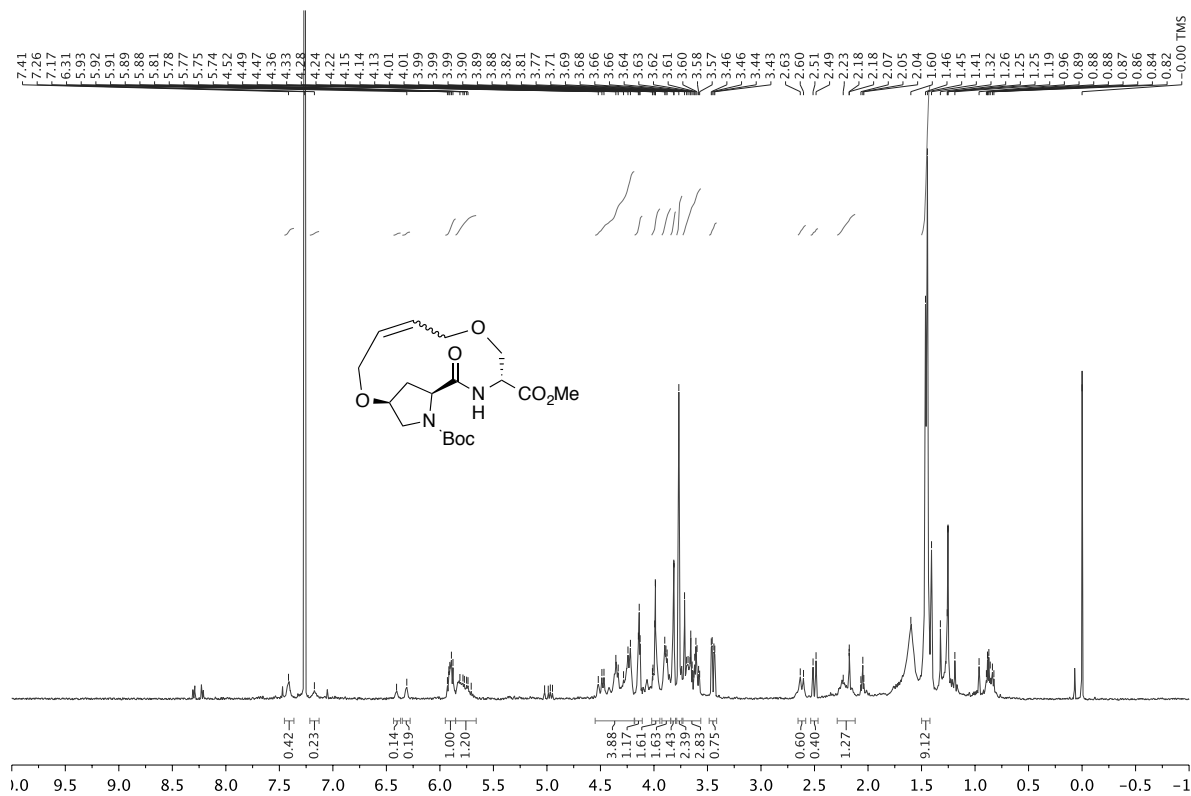

$^1\text{H}$  NMR of **6'** (500 MHz,  $\text{CDCl}_3$ )

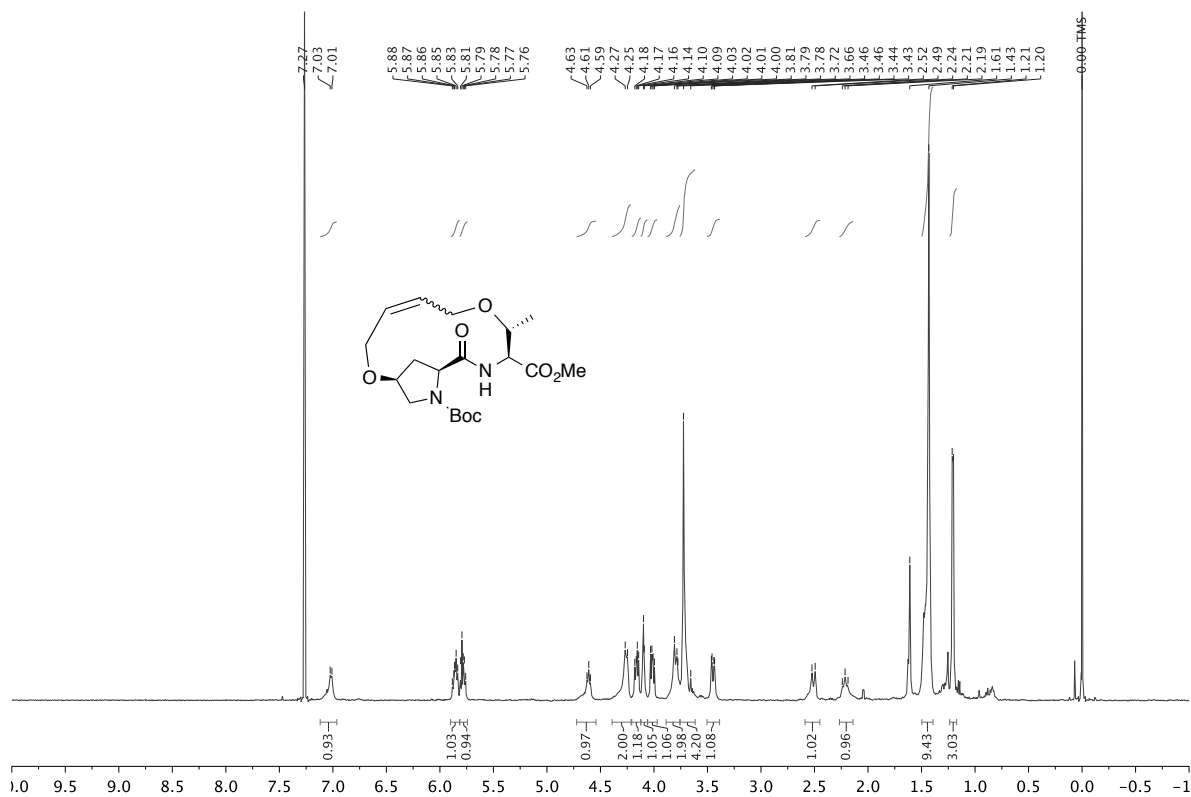

$^1\text{H}$  NMR of **7'** (500 MHz,  $\text{CDCl}_3$ )

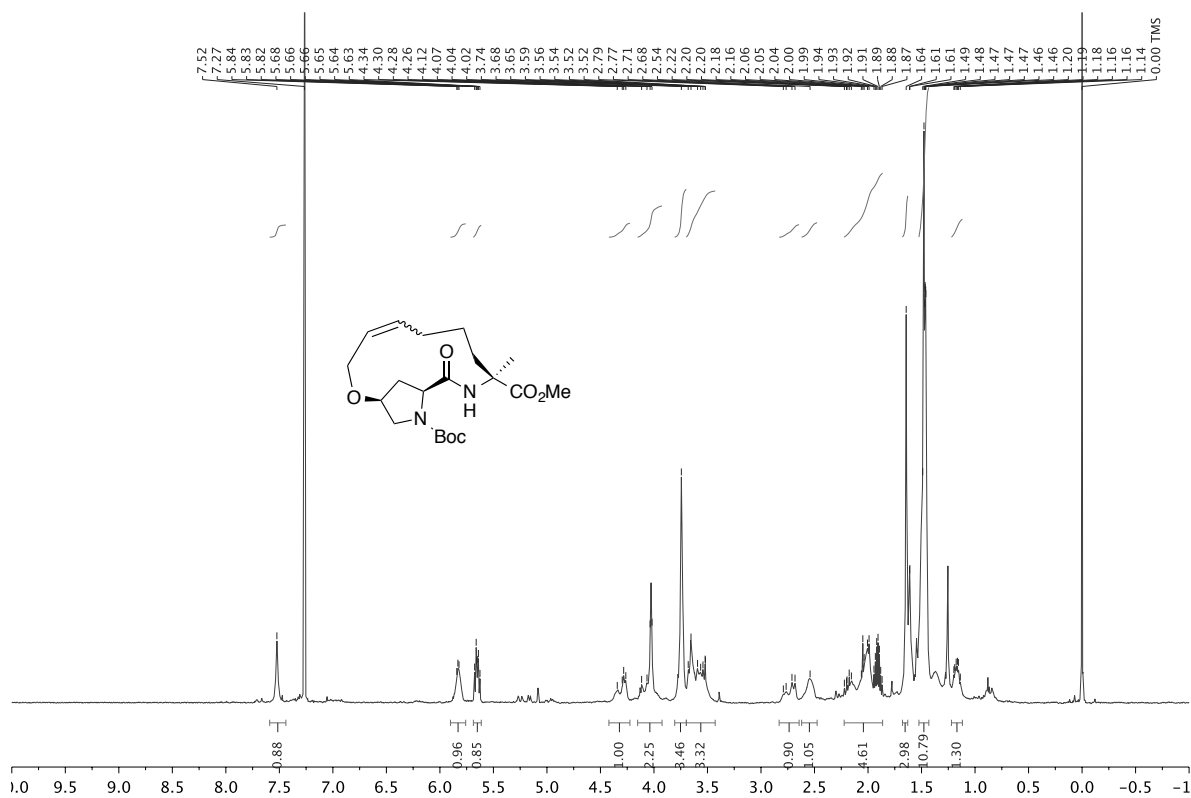

<sup>1</sup>H NMR of **9** (500 MHz, CDCl<sub>3</sub>)

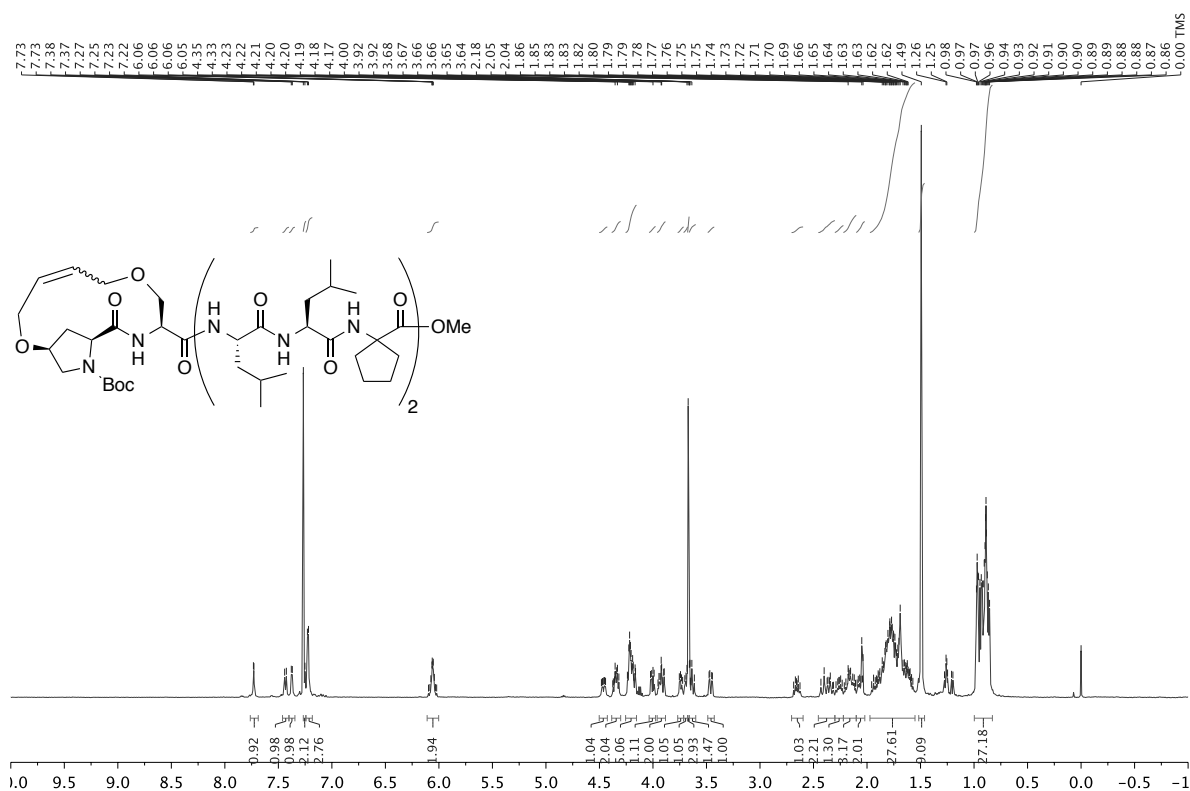

<sup>1</sup>H NMR of **10** (500 MHz, CDCl<sub>3</sub>)

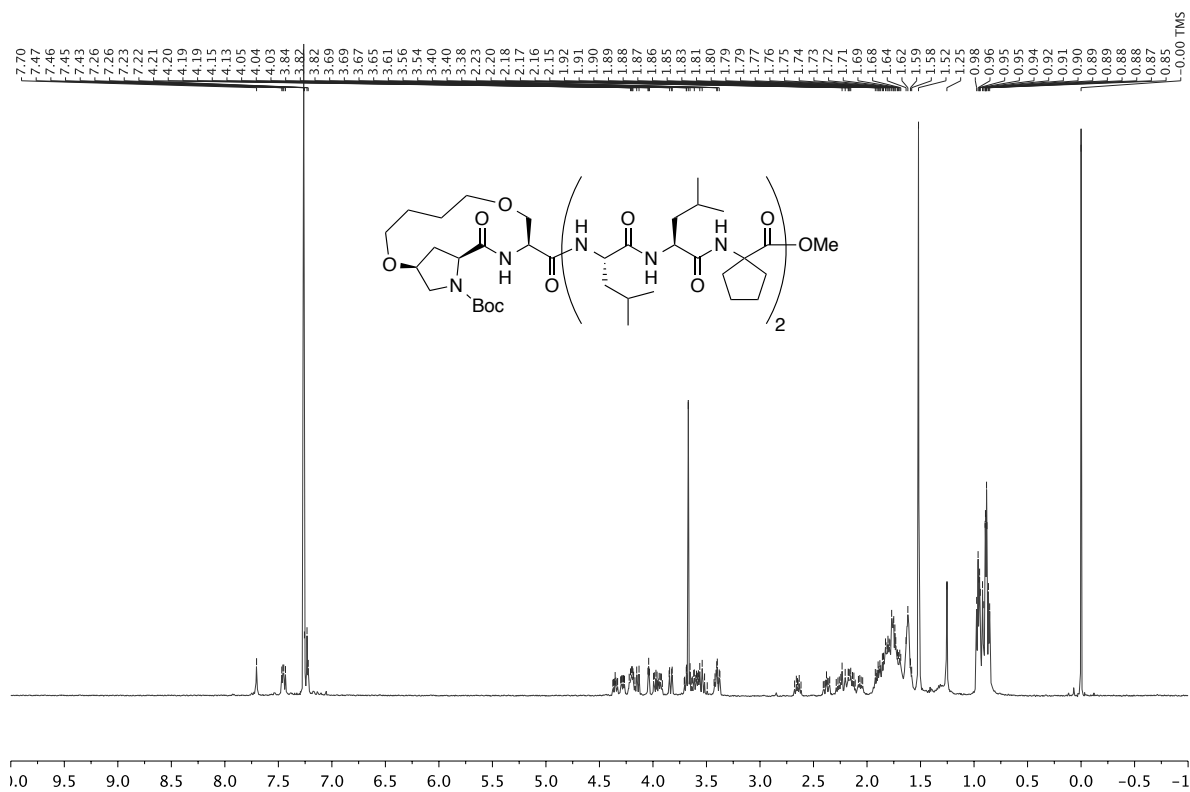

Supplement: s1 [file s1]
